# Supplementary material for: Variability analysis and inter-genotype comparison of human respiratory syncytial virus small hydrophobic gene
Source: Springer Nature journal article supplement (doi:10.1186/s12985-018-1020-9), 2018-07-18
Supplement: MOESM1 [file 15961968]

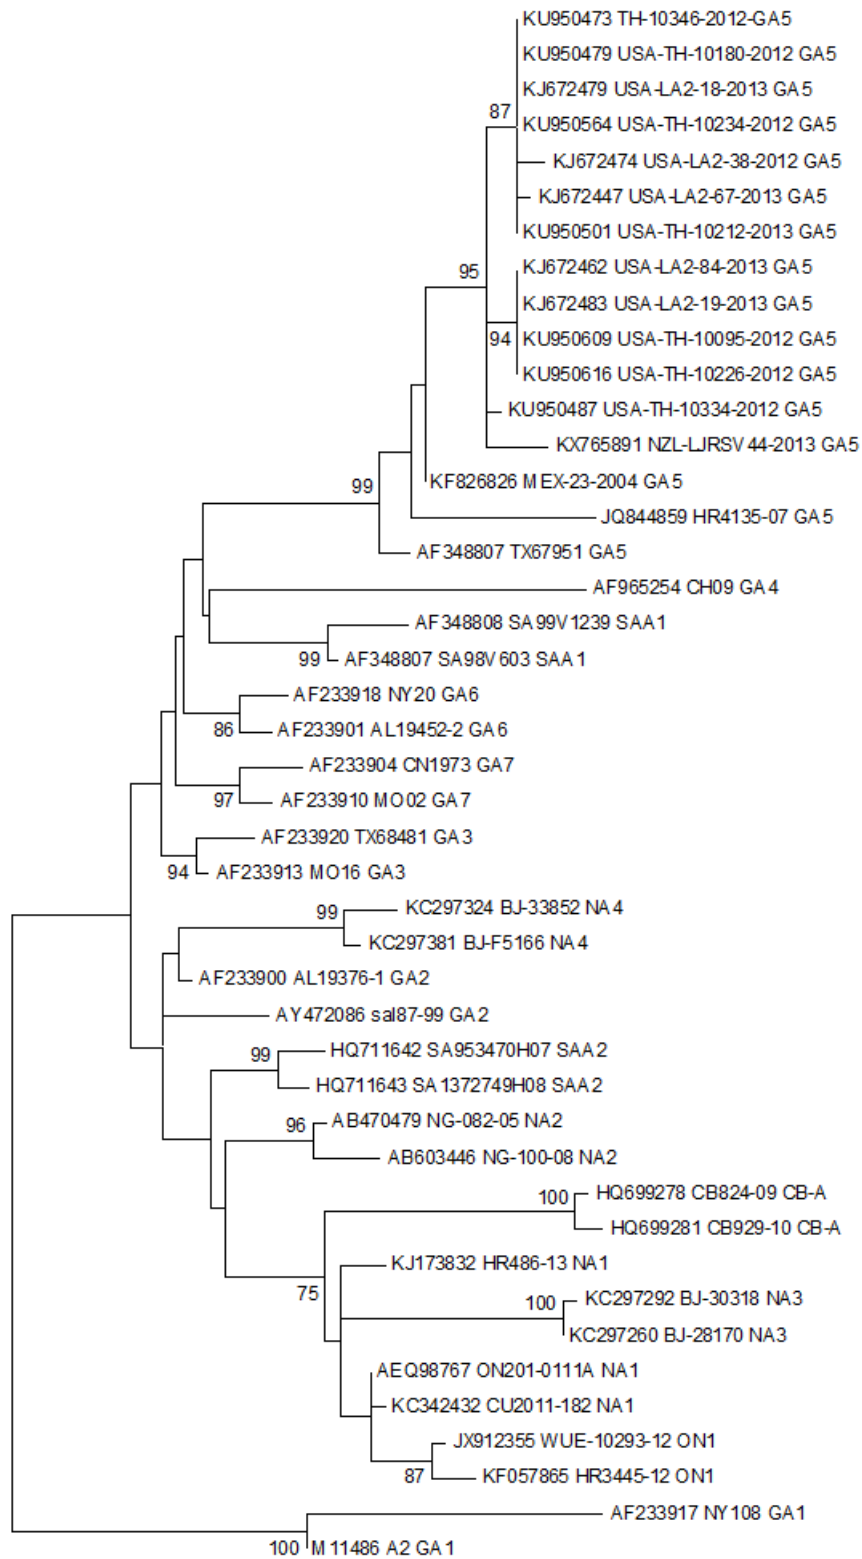

0.02
