# Supplementary material for: Variability analysis and inter-genotype comparison of human respiratory syncytial virus small hydrophobic gene
Source: Springer Nature journal article supplement (doi:10.1186/s12985-018-1020-9), 2018-07-18
Supplement: MOESM2 [file 15961968]

**HRSV-A**

**sequences identical in HVR2**

**sequences identical in SHseg**

**genotype NA1**

| group | strain name | group | strain name |
|-------|-------------|-------|-------------|
| 1.    | HR6350-11   | 1.    | HR100-13    |
| 2.    | HR7640-11   |       | HR116-13    |
| 3.    | HR7907-11   |       | HR130-13    |
| 4.    | HR8203-11   |       | HR135-13    |
| 5.    | HR8934-11   |       | HR146-13    |
| 6.    | HR9128-11   |       | HR162-13    |
| 7.    | HR16630-11  |       | HR171-13    |
| 8.    | HR19632-11  |       | HR172-13    |
|       | HR2083-12   |       | HR206-13    |
|       | HR2100-12   |       | HR250-13    |
| 9.    | HR2015-12   |       | HR280-13    |
|       | HR2176-12   |       | HR518-13    |
| 10.   | HR2033-12   |       | HR552-13    |
|       | HR2034-12   |       | HR555-13    |
|       | HR2089-12   |       | HR556-13    |
|       | HR2125-12   |       | HR590-13    |
|       | HR285-12    |       | HR593-13    |
|       | HR2202-12   |       | HR623-13    |
|       | HR2488-12   |       | HR633-13    |
|       | HR2512-12   |       | HR655-13    |
|       | HR110-15    |       | HR3234-12   |
|       | HR239-13    | 2.    | HR6350-11   |
| 11.   | HR2035-12   |       | HR16630-11  |
| 12.   | HR2051-12   |       | HR19632-11  |
| 13.   | HR2058-12   |       | HR2033-12   |
|       | HR2191-12   |       | HR2034-12   |
|       | HR2249-12   |       | HR2035-12   |
| 14.   | HR2146-12   |       | HR2083-12   |
| 15.   | HR2184-12   |       | HR2089-12   |
| 16.   | HR2199-12   |       | HR2100-12   |
|       | HR2308-12   |       | HR2125-12   |
| 17.   | HR2287-12   |       | HR285-12    |
| 18.   | HR2328-12   |       | HR2199-12   |
| 19.   | HR2338-12   |       | HR2202-12   |
| 20.   | HR2375-12   |       | HR2287-12   |
| 21.   | HR2433-12   |       | HR2308-12   |
| 22.   | HR2465-12   |       | HR2433-12   |
| 23.   | HR2666-12   |       | HR2666-12   |
| 24.   | HR3234-12   | 3.    | HR15-13     |
|       | HR5-13      |       | HR41-13     |
| 25.   | HR15-13     |       | HR129-13    |
|       | HR186-13    |       | HR175-13    |
| 26.   | HR41-13     |       | HR235-13    |
| 27.   | HR100-13    |       | HR432-13    |
|       | HR116-13    | 4.    | HR2015-12   |

|     |          |     |           |
|-----|----------|-----|-----------|
|     | HR128-13 |     | HR2146-12 |
|     | HR134-13 |     | HR2176-12 |
|     | HR135-13 | 5.  | HR2058-12 |
|     | HR146-13 |     | HR2191-12 |
|     | HR171-13 |     | HR2249-12 |
|     | HR206-13 | 6.  | HR186-13  |
|     | HR233-13 |     | HR372-13  |
|     | HR250-13 |     | HR636-13  |
|     | HR555-13 | 7.  | HR248-13  |
|     | HR556-13 |     | HR617-13  |
|     | HR558-13 |     | HR648-13  |
|     | HR590-13 | 8.  | HR110-15  |
|     | HR593-13 |     | HR239-13  |
|     | HR623-13 | 9.  | HR119-13  |
|     | HR655-13 |     | HR152-13  |
| 28. | HR119-13 | 10. | HR128-13  |
|     | HR129-13 |     | HR233-13  |
|     | HR172-13 | 11. | HR675-13  |
|     | HR189-13 |     | HR736-13  |
|     | HR235-13 | 12. | HR7640-11 |
|     | HR432-13 | 13. | HR8934-11 |
|     | HR581-13 | 14. | HR7907-11 |
| 29. | HR130-13 | 15. | HR8203-11 |
| 30. | HR152-13 | 16. | HR9128-11 |
| 31. | HR162-13 | 17. | HR2051-12 |
| 32. | HR175-13 | 18. | HR2184-12 |
|     | HR372-13 | 19. | HR2328-12 |
|     | HR636-13 | 20. | HR2338-12 |
| 33. | HR248-13 | 21. | HR2375-12 |
|     | HR617-13 | 22. | HR2465-12 |
|     | HR648-13 | 23. | HR2488-12 |
| 34. | HR280-13 | 24. | HR2512-12 |
|     | HR518-13 | 25. | HR134-13  |
| 35. | HR454-13 | 26. | HR189-13  |
| 36. | HR552-13 | 27. | HR454-13  |
|     | HR633-13 | 28. | HR558-13  |
| 37. | HR675-13 | 29. | HR581-13  |
|     | HR736-13 | 30. | HR5-13    |

**genotype ON1**

| group | strain name | group | strain name |
|-------|-------------|-------|-------------|
| 1.    | HR2095-12   | 1.    | HR2095-12   |
| 2.    | HR2117-12   |       | HR194-13    |
| 3.    | HR122-13    |       | HR234-13    |
|       | HR598-13    |       | HR84-14     |
| 4.    | HR194-13    |       | HR239-14    |
|       | HR234-13    |       | HR242-14    |
|       | HR429-13    |       | HR258-14    |
| 5.    | HR354-13    |       | HR266-14    |
| 6.    | HR490-13    |       | HR268-14    |
| 7.    | HR620-13    |       | HR478-14    |
| 8.    | HR624-13    |       | HR501-14    |
| 9.    | HR641-13    | 2.    | HR414-14    |
| 10.   | HR718-13    |       | HR457-14    |
| 11.   | HR84-14     |       | HR494-14    |
| 12.   | HR102-14    | 3.    | HR102-14    |
|       | HR307-14    |       | HR307-14    |
| 13.   | HR174-14    | 4.    | HR174-14    |
|       | HR246-14    |       | HR246-14    |
| 14.   | HR196-14    | 5.    | HR2117-12   |
| 15.   | HR414-14    | 6.    | HR354-13    |
|       | HR268-14    | 7.    | HR429-13    |
|       | HR457-14    | 8.    | HR490-13    |
|       | HR478-14    | 9.    | HR598-13    |
|       | HR494-14    | 10.   | HR620-13    |
|       | HR501-14    | 11.   | HR624-13    |
| 16.   | HR226-14    | 12.   | HR641-13    |
| 17.   | HR228-14    | 13.   | HR718-13    |
|       | HR506-14    | 14.   | HR196-14    |
| 18.   | HR239-14    | 15.   | HR226-14    |
|       | HR242-14    | 16.   | HR228-14    |
| 19.   | HR258-14    | 17.   | HR491-14    |
| 20.   | HR266-14    | 18.   | HR122-13    |
| 21.   | HR367-14    | 19.   | HR367-14    |
| 22.   | HR491-14    | 20.   | HR506-14    |

**genotype GA5**

| group | strain name | group | strain name |
|-------|-------------|-------|-------------|
| 1.    | HR358-14    | 1.    | HR358-14    |
|       | HR423-14    |       | HR423-14    |
|       | HR426-14    |       | HR426-14    |

HRSV-B

sequences identical in HVR2

sequences identical in SHseg

genotype BA9

| group | strain name | group | strain name |
|-------|-------------|-------|-------------|
| 1.    | HR6808-11   | 1.    | HR586-13    |
| 2.    | HR468-12    |       | HR1765-13   |
|       | HR1019-12   |       | HR1784-13   |
|       | HR2244-12   |       | HR1895-13   |
|       | HR2264-12   |       | HR1912-13   |
|       | HR2577-12   |       | HR44-14     |
| 3.    | HR1156-12   |       | HR57-14     |
|       | HR1948-12   |       | HR142-14    |
|       | HR2006-12   |       | HR143-14    |
|       | HR2013-12   |       | HR144-14    |
|       | HR2116-12   |       | HR157-14    |
|       | HR2154-12   |       | HR158-14    |
|       | HR2253-12   |       | HR180-14    |
|       | HR2362-12   |       | HR296-14    |
|       | HR2458-12   |       | HR471-14    |
| 4.    | HR1881-12   |       | HR157-14    |
| 5.    | HR1883-12   |       | HR428-14    |
| 6.    | HR2052-12   |       | HR378-14    |
| 7.    | HR2207-12   | 2.    | HR468-12    |
| 8.    | HR2248-12   |       | HR1019-12   |
| 9.    | HR2617-12   |       | HR1156-12   |
|       | HR2637-12   |       | HR2244-12   |
| 10.   | HR3386-12   |       | HR2264-12   |
|       | HR27-13     |       | HR2577-12   |
|       | HR28-13     |       | HR1156-12   |
|       | HR109-13    |       | HR1948-12   |
|       | HR207-13    |       | HR2006-12   |
|       | HR208-13    |       | HR2013-12   |
|       | HR221-13    |       | HR2253-12   |
|       | HR224-13    |       | HR2362-12   |
|       | HR259-13    |       | HR2458-12   |
| 11.   | HR269-13    |       | HR1883-12   |
|       | HR370-13    |       | HR2052-12   |
|       | HR374-13    |       | HR2207-12   |
| 12.   | HR307-13    |       | HR2248-12   |
| 13.   | HR479-13    | 3.    | HR2637-12   |
| 14.   | HR501-13    |       | HR27-13     |
| 15.   | HR586-13    |       | HR28-13     |
|       | HR1765-13   |       | HR109-13    |
|       | HR1784-13   |       | HR207-13    |
|       | HR1895-13   |       | HR208-13    |
|       | HR1912-13   |       | HR221-13    |
|       | HR44-14     |       | HR224-13    |
|       | HR57-14     |       | HR259-13    |
|       | HR122-14    |       | HR370-13    |

|     |          |     |           |
|-----|----------|-----|-----------|
|     | HR142-14 |     | HR501-13  |
|     | HR143-14 | 4.  | HR189-14  |
|     | HR144-14 |     | HR331-14  |
|     | HR158-14 |     | HR200-14  |
|     | HR180-14 |     | HR282-14  |
|     | HR207-14 |     | HR287-14  |
|     | HR269-14 |     | HR492-14  |
|     | HR296-14 | 5.  | HR40-14   |
|     | HR348-14 |     | HR325-14  |
|     | HR402-14 |     | HR137-14  |
|     | HR471-14 |     | HR233-14  |
| 16. | HR804-13 | 6.  | HR3386-12 |
| 17. | HR35-14  |     | HR269-13  |
| 18. | HR40-14  |     | HR374-13  |
|     | HR116-14 | 7.  | HR35-14   |
|     | HR189-14 |     | HR208-14  |
|     | HR325-14 | 8.  | HR74-14   |
| 19. | HR63-14  |     | HR122-14  |
|     | HR331-14 | 9.  | HR269-14  |
| 20. | HR74-14  |     | HR402-14  |
| 21. | HR137-14 | 10. | HR6808-11 |
| 22. | HR157-14 | 11. | HR1881-12 |
|     | HR428-14 | 12. | HR2154-12 |
| 23. | HR200-14 | 13. | HR2617-12 |
| 24. | HR208-14 | 14. | HR307-13  |
| 25. | HR233-14 | 15. | HR479-13  |
| 26. | HR282-14 | 16. | HR804-13  |
| 27. | HR287-14 | 17. | HR63-14   |
| 28. | HR378-14 | 18. | HR116-14  |
| 29. | HR492-14 | 19. | HR207-14  |
| 30. | HR494-14 | 20. | HR494-14  |
| 31. | HR530-14 | 21. | HR530-14  |

**genotype BA10**

| group | strain name |
|-------|-------------|
| 1.    | HR2153-12   |

**genotype BA10**

| group | strain name |
|-------|-------------|
| 1.    | HR2153-12   |
